## ENT Surgery

### 71 The Use of Sternocleidomastoid Rotational and Cervicofacial Advancement Flap for Closure of a Persistent Mastoid Cutaneous Fistula

A. Mantelakis<sup>1</sup>, Y. Tsitsiou<sup>2</sup>, A. Joshi<sup>3</sup>

<sup>1</sup>Guys and St Thomas's NHS Foundation Trust, London, United Kingdom,

<sup>2</sup>Imperial Healthcare Hospitals NHS Foundation Trust, London, United Kingdom,

<sup>3</sup>Lewisham and Greenwich NHS Foundation Trust, London, United Kingdom

**Introduction:** Postauricular mastoid fistula is a rare occurrence, typically following repeated soft tissue injury, commonly caused by chronic suppurative otitis media and repeated surgical treatments. Management is challenging with a limited number of reported, successful surgical techniques, which often have limited applicability.

**Case report:** We present a case of a 55-year-old male patient with a persistent right post-auricular cutaneous mastoid fistula as a result of two previous mastoidectomies. Although the patient underwent two simple primary closures, the fistula recurred. This was successfully treated with a new technique utilising a Sternocleidomastoid Rotational and Cervicofacial Advancement Flap which was completely healed at the 1-year follow-up without a recurrence of the fistula.

**Conclusions:** This novel technique provided a definitive obliteration of a persistent cutaneous mastoid fistula. By utilising a double layered flap, via a facelift incision, the flap results in an excellent functional and cosmetic result.
